# Supplementary material for: Blimp1 controls photoreceptor versus bipolar cell fate choice during retinal development
Source: Oxford University Press journal article supplement (doi:10.1242/dev.043968), 2010-01-28
Supplement: dev043968tables1.pdf [file dev043968tables1.pdf]

**Table S1. Fate distribution of transfected cells at P5\***

|                       | Otx2 <sup>+</sup> photoreceptors | Otx2 <sup>++</sup> bipolarst <sup>†</sup> | Otx2 <sup>-</sup> | Chx10 <sup>+</sup> bipolar |
|-----------------------|----------------------------------|-------------------------------------------|-------------------|----------------------------|
| GFP                   | 52.06±7.76%                      | 25.66±7.10%                               | 22.29±5.49%       | 18.14±4.07%                |
| Blimp1-GFP            | 65.93±4.76%                      | 19.59±3.87%                               | 14.49±3.36%       | 7.43±1.88%                 |
| <i>P</i> <sup>§</sup> | 0.001                            | 0.043                                     | 0.003             | 0.008                      |

\*The percentage of transfected cells ± s.d.

<sup>†</sup>Includes bipolar and undifferentiated bipolar and photoreceptors.

<sup>‡</sup>Most Otx2<sup>-</sup> cells had nuclei in the INL.

<sup>§</sup>Unpaired, two-tailed *t*-test. *n*=9 400× fields from three retinas for GFP (total of 1013 cells) and *n*=9 400× fields from three retinas for Blimp1-GFP transfections (total of 823 cells).
